# Supplementary material for: Ti3C2 MXene cocatalyst supported Ti3C2/SrTiO3/g-C3N4 heterojunctions with efficient electron transfer for photocatalytic H2 production
Source: Royal Society of Chemistry journal article supplement (doi:10.1039/d4ce00745j), 2024-01-01
Supplement: d4ce00745j1.pdf [file d4ce00745j1.pdf]

## Supporting Information

# **Ti<sub>3</sub>C<sub>2</sub> MXene cocatalyst supported Ti<sub>3</sub>C<sub>2</sub>/SrTiO<sub>3</sub>/g-C<sub>3</sub>N<sub>4</sub> heterojunctions with efficient electron transfer for photocatalytic H<sub>2</sub> production**

Xiaoyun Ye<sup>a, \*</sup>, Hangyu Zhong<sup>a</sup>, Yumei Zhang<sup>a</sup>, Xuehua Liu<sup>a</sup>, Wei Tian<sup>b</sup>, Li-An Ma<sup>a, \*</sup>,

Qianting Wang<sup>a, c, \*</sup>

<sup>a</sup> College of Materials Science and Engineering, Fujian University of Technology, 33 South Xuefu Road, Fuzhou 350118, China

<sup>b</sup> College of Ecological Environment and Urban Construction, Fujian University of Technology, 33 South Xuefu Road, Fuzhou 350118, China

<sup>c</sup> School of Materials Science and Engineering, Xiamen University of Technology, Xiamen, 361024, China

\*Corresponding author.

Email address: creekye@163.com (X. Ye); mlajn@163.com (L. Ma);  
wqt@xmut.edu.cn (Q. Wang)

**Table S1** The experimental parameters of the samples

| Sample             | Ti <sub>3</sub> C <sub>2</sub><br>(mg) | TiO <sub>2</sub><br>(mg) | Sr(NO <sub>3</sub> ) <sub>2</sub><br>(mg) | Ti <sub>3</sub> C <sub>2</sub> /SrTiO <sub>3</sub><br>(mg) | g-C <sub>3</sub> N <sub>4</sub> (mg) | Reaction time<br>(h) | Roasting<br>temperature (°C) |
|--------------------|----------------------------------------|--------------------------|-------------------------------------------|------------------------------------------------------------|--------------------------------------|----------------------|------------------------------|
| SrTiO <sub>3</sub> | -                                      | 40                       | 105.8                                     | -                                                          | -                                    | 4                    | 140                          |
| MS                 | 137.6                                  | 40                       | 105.8                                     | -                                                          | -                                    | 4                    | 140                          |
| MSCN-20            | 0                                      | 0                        |                                           | 120                                                        | 30                                   | 2                    | 200                          |
| MSCN-40            | 0                                      | 0                        |                                           | 120                                                        | 80                                   | 2                    | 200                          |
| MSCN-60            | 0                                      | 0                        |                                           | 120                                                        | 180                                  | 2                    | 200                          |
| MSCN-80            | 0                                      | 0                        |                                           | 120                                                        | 480                                  | 2                    | 200                          |

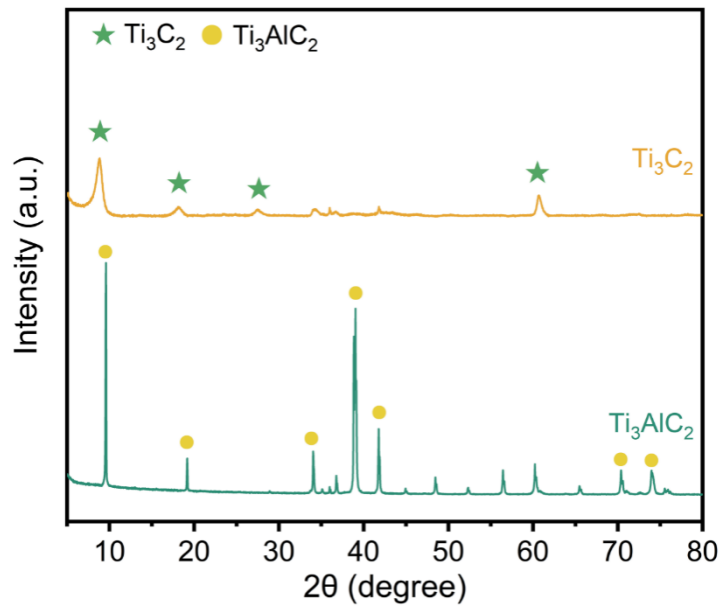

**Fig. S1** XRD patterns of Ti<sub>3</sub>AlC<sub>2</sub> and Ti<sub>3</sub>C<sub>2</sub>

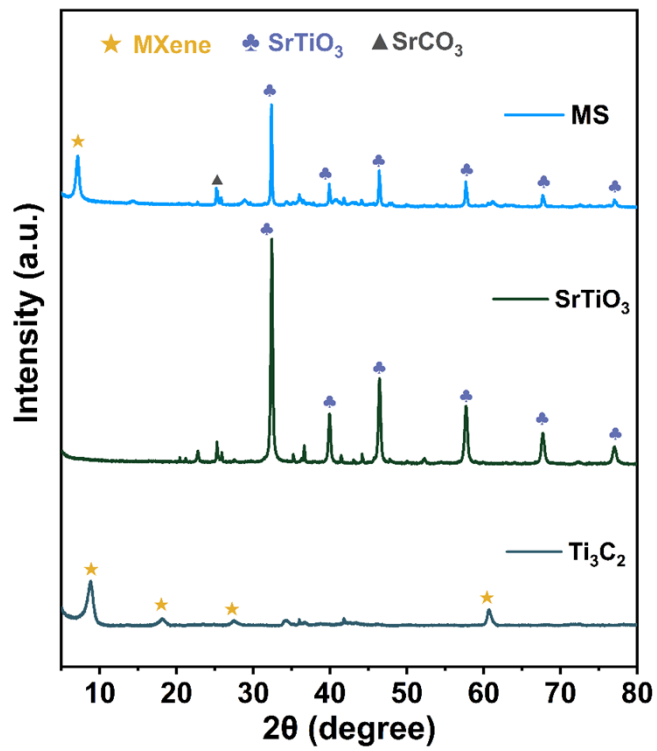

Fig. S2 XRD patterns of  $\text{Ti}_3\text{C}_2$ ,  $\text{SrTiO}_3$  and MS

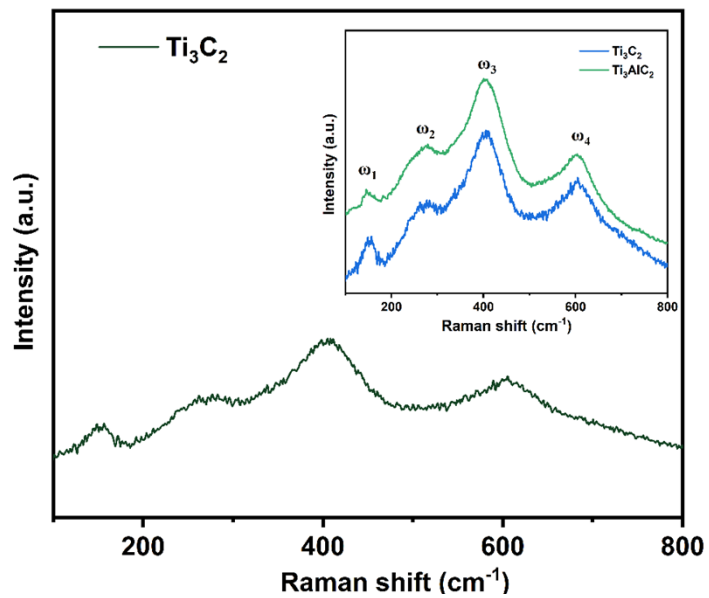

Fig. S3 Raman spectra of  $\text{Ti}_3\text{C}_2$

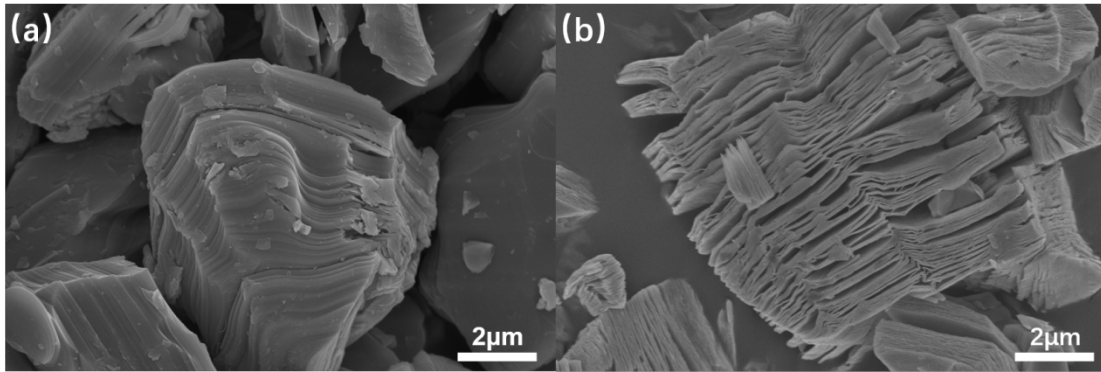

Fig. S4 SEM images of (a)  $Ti_3AlC_2$ , (b)  $Ti_3C_2$

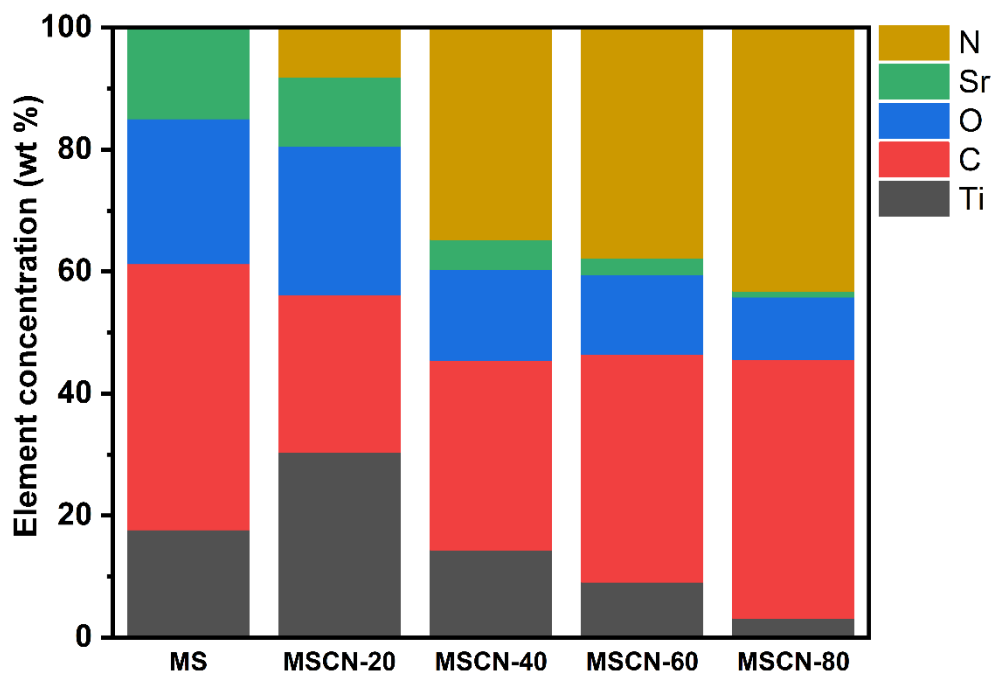

Fig. S5 The quantitative analysis of MSCN-60

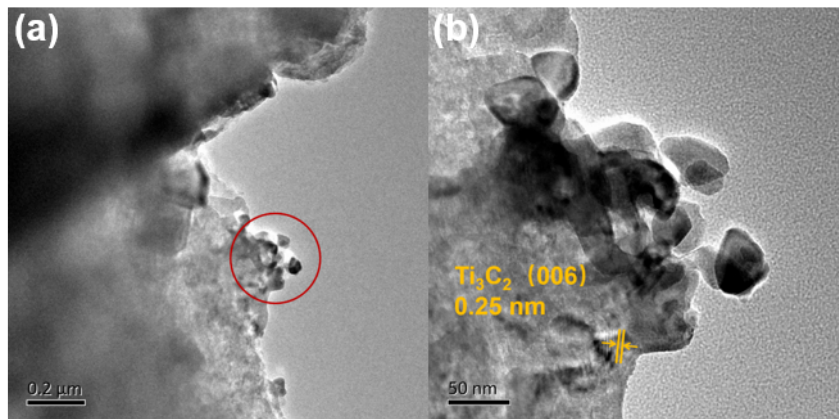

Fig. S6 TEM images of the MS

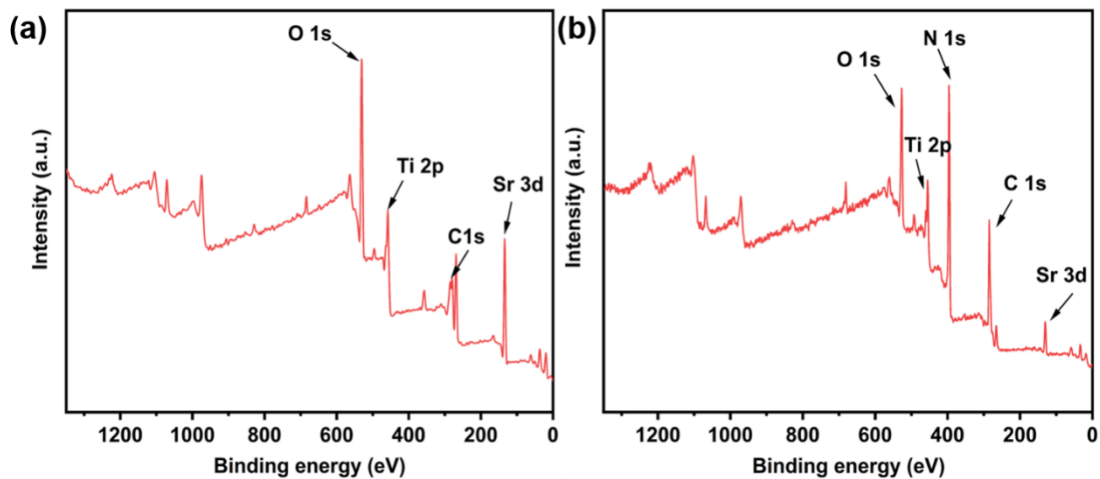

Fig. S7 XPS full spectra of (a) MS, (b) MSCN-60

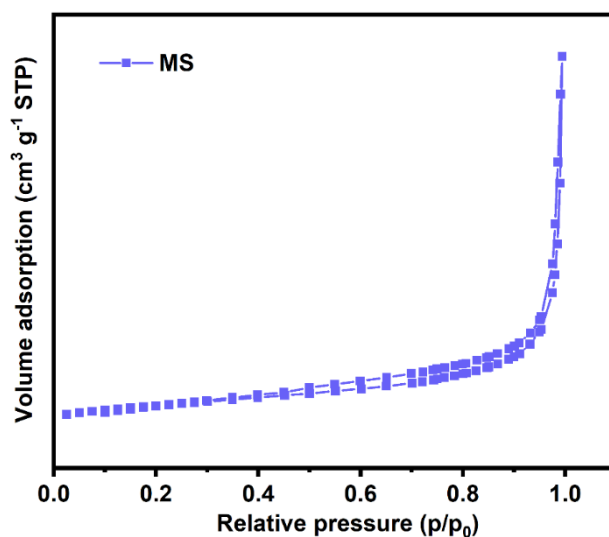

Fig. S8 N<sub>2</sub> isothermal adsorption-desorption curves of the MS

Table S2 Specific surface area and pore volume data of the samples

| Samples | S <sub>BET</sub> (m <sup>2</sup> /g) | <sup>a</sup> PV (cm <sup>3</sup> /g) |
|---------|--------------------------------------|--------------------------------------|
| MS      | 8.05                                 | 3.41                                 |
| MSCN-20 | 14.79                                | 0.09                                 |
| MSCN-40 | 6.96                                 | 0.06                                 |
| MSCN-60 | 5.70                                 | 0.09                                 |
| MSCN-80 | 10.15                                | 0.09                                 |

<sup>a</sup>PV: void volume

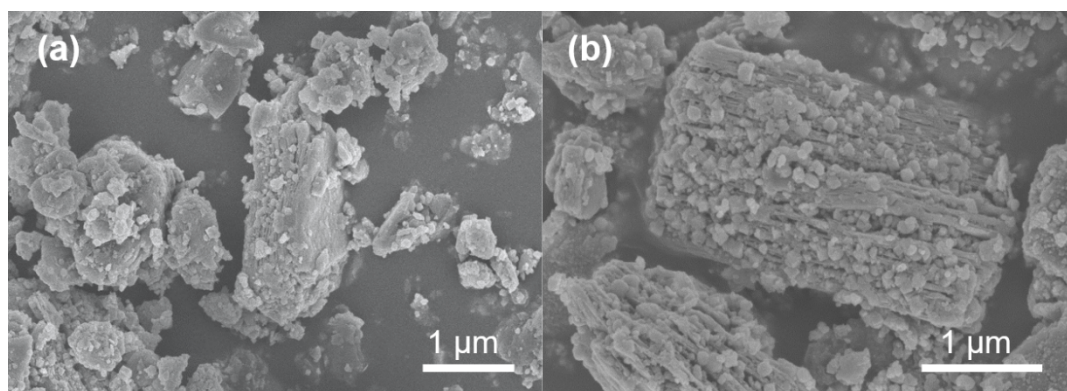

**Fig. S9 SEM images of MSCN-60**

**Table S3 The performance comparison of this work and the related photocatalysts**

| Photocatalyst                                               | Light source       | Performance<br>( $\mu\text{mol}\cdot\text{g}^{-1}\cdot\text{h}^{-1}$ ) | Year | Reference |
|-------------------------------------------------------------|--------------------|------------------------------------------------------------------------|------|-----------|
| $\text{TiO}_2/\text{Ti}_3\text{C}_2/\text{g-C}_3\text{N}_4$ | visible light      | 2592                                                                   | 2021 | [48]      |
| $\text{Ti}_3\text{C}_2/\text{R-TiO}_2$                      | simulated sunlight | 0.00162                                                                | 2023 | [49]      |
| $\text{Ti}_3\text{C}_2/\text{TiO}_2/\text{rGO}$             | simulated sunlight | 417.96                                                                 | 2022 | [50]      |
| $\text{TiO}_2\{001\}/\text{g-C}_3\text{N}_4$                | visible light      | 1780                                                                   | 2021 | [51]      |
| $\text{Au}/\text{SrTiO}_3/\text{TiO}_2$                     | visible light      | 327.4                                                                  | 2022 | [52]      |
| $\text{C-TiO}_2/\text{g-C}_3\text{N}_4$                     | visible light      | 1409                                                                   | 2020 | [53]      |
| $\text{Cu}_2\text{O}/\text{TiO}_2$                          | simulated sunlight | 1388.13                                                                | 2022 | [54]      |
| $\text{N}_2\text{-TiO}_2$                                   | visible light      | 103.6                                                                  | 2023 | [55]      |
| MSCN-60                                                     | simulated sunlight | 1733.13                                                                | 2024 | This work |

## 2.4 Materials characterization

The samples were characterized morphologically and structurally characterized by field emission scanning electron microscopy (FESEM, NANO-VASEM 450, FEI) and transmission electron microscopy (TEM, JEM-2100, JEOL). The crystal structures of the samples were characterized by X-ray powder diffraction (XRD, D8-ADVANCE, BRUKER) under  $\text{Cu-K}\alpha$  radiation ( $\lambda = 1.54056 \text{ \AA}$ ) at a scanning rate of  $6^\circ/\text{min}$  in the  $2\theta$  range from  $5^\circ$  to  $80^\circ$ . A Raman spectrometer (Thermo Fisher Scientific DXRxi) was used, excited by a 663 nm laser was used. Composition and elemental distribution were observed by energy dispersive spectroscopy (EDS, OXFORD). Electron binding

energy, elemental valence and surface composition were analyzed by X-ray photoelectron spectroscopy (XPS, ESCALAB 250Xi) using an Al-K $\alpha$  X-ray source. N<sub>2</sub> adsorption-desorption curves were recorded on a 3Flex 3500 analyzer (Micromeritics ASAP 2020, USA) to measure the surface area and pore volume of the samples. The fluorescence spectrometer (FLS980, Edinburgh Instruments) was used to measure the time-resolved PL decay curves. The absorption capacity of the samples was analyzed on a UV-Vis diffuse reflectance spectrophotometer (SHIMADZU UV-3600 Plus) using BaSO<sub>4</sub> as a standard material. Electrochemistry impedance spectroscopy (EIS) and photocurrent intensity response measurements with a 300 W Xe lamp were performed on an electrochemical workstation (CS310H, Corrtest) based on a conventional three electrode cell, where a sample-coated clean fluoride-tin oxide (FTO) glass, Pt plate and a Calomel electrode were used as the working electrode, counter electrode (CE) and reference electrode (RE), respectively. The aqueous solution of 0.5 M Na<sub>2</sub>SO<sub>4</sub> purged with nitrogen gas was used as the electrolyte.

**Photocatalytic hydrogen evolution test:** The photocatalytic hydrogen evolution test was performed in a 100 mL quartz glass reactor. 20 mg of the composite photocatalyst was dispersed in 20 mL of a 20 vol% methanol aqueous solution (in the photocatalytic reaction, an amount of H<sub>2</sub>PtCl<sub>6</sub> solution was added to the reaction solution, and 3 wt% of Pt was in-situ deposited on the photocatalyst as a co-catalyst), which was then transferred to a quartz container. Prior to the illumination experiments, the interior of the reactor was evacuated to ensure a vacuum environment. A 300 W Xe lamp (MC-PF300C, Beijing Merry Change Technology Co., Ltd.) was selected as the

light source. The reaction system was illuminated with the full solar spectrum and circulating cooling water was used to maintain the entire reactor temperature at a constant 25 °C with a reaction time of 4 h. The reaction system was kept under constant agitation to ensure uniform irradiation of the catalyst suspension during the experimental process. Using pure argon as the carrier gas, a gas chromatograph (GC9790II, Zhejiang Fuli Analytical Instrument Co., Ltd.) was used to analyze the composition of the gas produced. The molar amount of hydrogen produced per unit mass of photocatalyst per unit time was calculated as an evaluation criterion of the activity of the photocatalyst.
